# Supplementary material
Source: PubMed Central journal article supplement (PMC8516178)
Supplement: Conceptual_Model_of_Factors.pdf [file Conceptual_Model_of_Factors.pdf]

## APPENDIX 2

**Figure 1. Conceptual model of factors that influence the success of quality improvement initiatives**

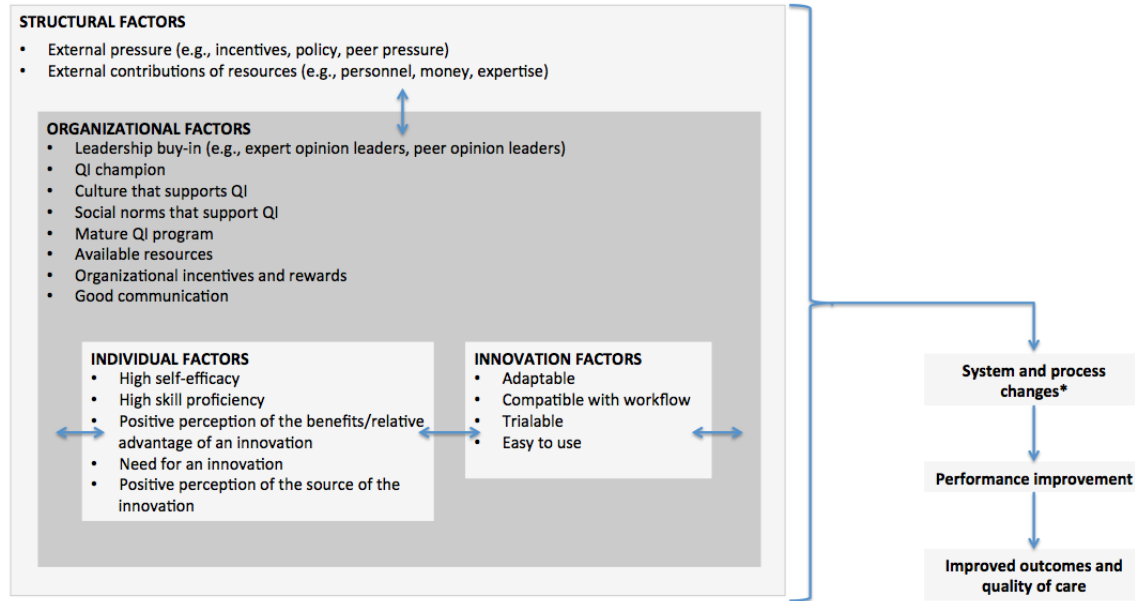

\* System and process changes refer to changes made to the underlying system of care (e.g., people, infrastructure, technology) or changes made to the processes of care/service delivery
